# Supplementary material
Source: MDPI journal article supplement (https://www.mdpi.com/2311-5637/8/2/44)
Supplement: s1 [file s1]

| Colony number | Macroscopic and Microscopic appearance                                              | Morphology description and productivity                                                                                                                                                                            | Identification medium |
|---------------|-------------------------------------------------------------------------------------|--------------------------------------------------------------------------------------------------------------------------------------------------------------------------------------------------------------------|-----------------------|
| 1             | 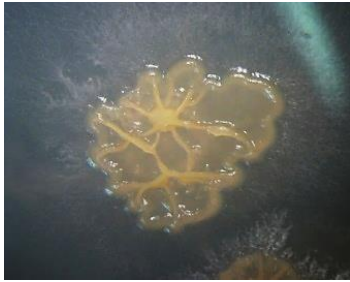   | Shape: irregular, surrounded by radial mycelium growth<br>Margins: lobate<br>Color: okra<br>Surface: rough<br>Avoparcin: 4.5 g/L                                                                                   | BTT-P                 |
| 6             |    | Shape: irregular<br>Margins: lobate, surrounded by radial mycelium growth<br>Color: orange<br>Surface: rough<br>Avoparcin: 1.7 g/L                                                                                 | ISP2                  |
| 8             |  | Shape: round<br>Margins: irregular, surrounded by vigorous radial mycelium growth<br>Color: okra<br>Surface: rough<br>Avoparcin: 1.9 g/L                                                                           | BTT-P                 |
| 10            |  | Shape: round<br>Margins: irregular, surrounded by radial mycelium growth<br>Color: white to light yellow<br>Surface: vertically protruding at the margins and depressed in the center, rough<br>Avoparcin: 8.5 g/L | ISP2                  |
| 14            |  | Shape: round<br>Margins: regular and fluffy, surrounded by radial mycelium growth with brownish color<br>Color: okra to light brown<br>Surface: rough<br>Avoparcin: 9.3 g/L                                        | BTT-P                 |

| Colony number | Macroscopic and Microscopic appearance                                              | Morphology description                                                                                                                                                                      | Identification medium |
|---------------|-------------------------------------------------------------------------------------|---------------------------------------------------------------------------------------------------------------------------------------------------------------------------------------------|-----------------------|
| 17            |    | Shape: round<br>Margins: regular, surrounded by radial mycelium growth<br>Color: white<br>Surface: dry and fragmented<br>Avoparcin: 2.5 g/L                                                 | BTT-P                 |
| 18            |    | Shape: round<br>Margins: irregular, surrounded by fluffy and vigorous radial mycelium growth<br>Color: white<br>Surface: rough<br>Avoparcin: 8.5 g/L                                        | ISP2                  |
| 22            |  | Shape: round<br>Margins: irregular, surrounded by radial mycelium growth<br>Color: white<br>Surface: fluffy<br>Avoparcin: 8.0 g/L                                                           | ISP2                  |
| 23            |  | Shape: round<br>Margins: regular<br>Color: light brown/pinkish<br>Surface: rough, irregular and protruding in the center<br>Avoparcin: 6.0 g/L                                              | BTT-P                 |
| 24            |  | Shape: irregular<br>Margins: slightly lobate, surrounded by faint radial mycelium growth<br>Color: light brown<br>Surface: rough and heavily protruding in the centre<br>Avoparcin: 2.2 g/L | ISP2                  |

|    |                                                                                   |                                                                                                                                                                                                             |       |
|----|-----------------------------------------------------------------------------------|-------------------------------------------------------------------------------------------------------------------------------------------------------------------------------------------------------------|-------|
| 29 | 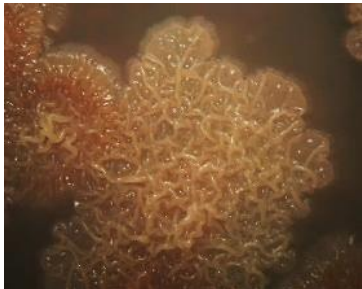 | Shape: irregular<br>Margins: lobate, fast growth and colonization of neighboring colonies<br>Color: light brown/okra<br>Surface: rough<br>Avoparcin: 1.4 g/L                                                | BTT-P |
| 30 |  | Shape: round<br>Margins: irregular, fast growth and colonization of neighboring colonies, lobate surrounded by scarce radial mycelium growth<br>Color: light yellow<br>Surface: rough<br>Avoparcin: 1.3 g/L | ISP2  |

**Table S1.** Description of the morphological variants isolated from *A. coloradensis* ATCC 53629. Each independent clone was cross-checked for purity and stability of the phenotype on different agar media. Avoparcin productivity SD =  $\pm 10\%$ .
